# Supplementary material for: Confounding Factors in the Transcriptome Analysis of an In-Vivo Exposure Experiment
Source: PubMed Central journal article supplement (PMC4720430; doi:10.1371/journal.pone.0145252), 2016-01-20

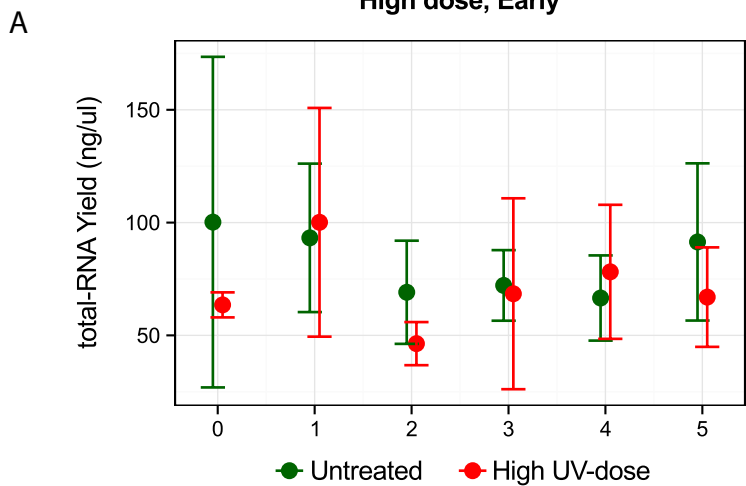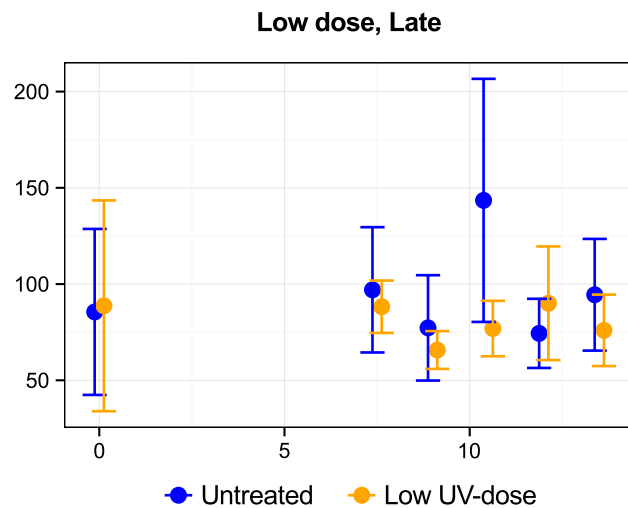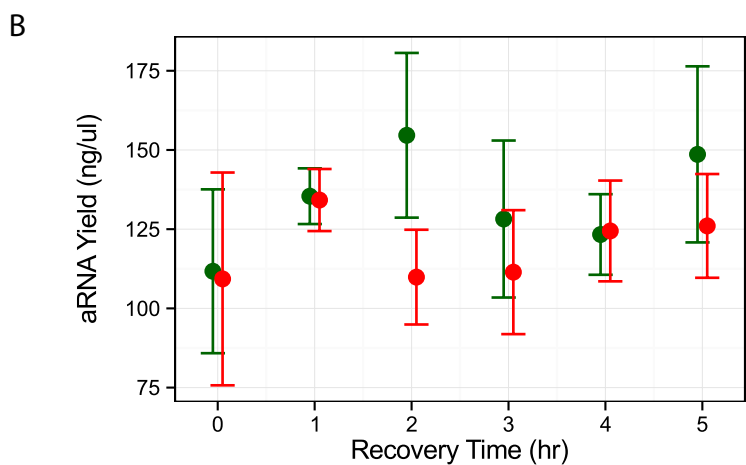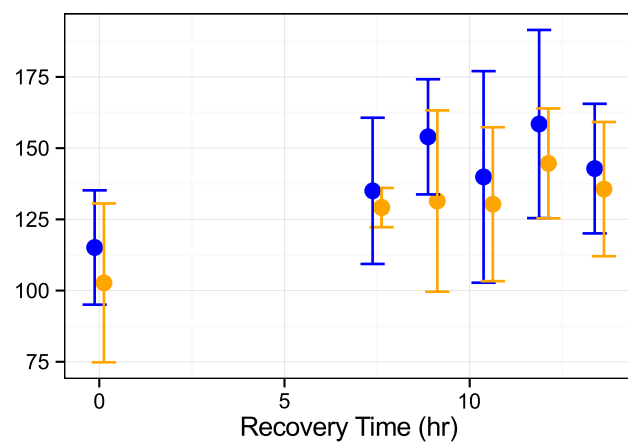

Early recovery time Late recovery time

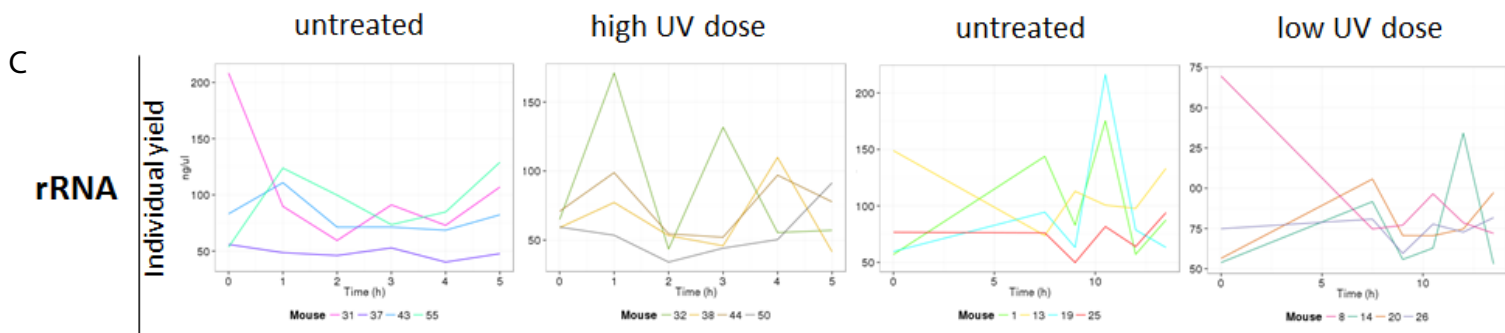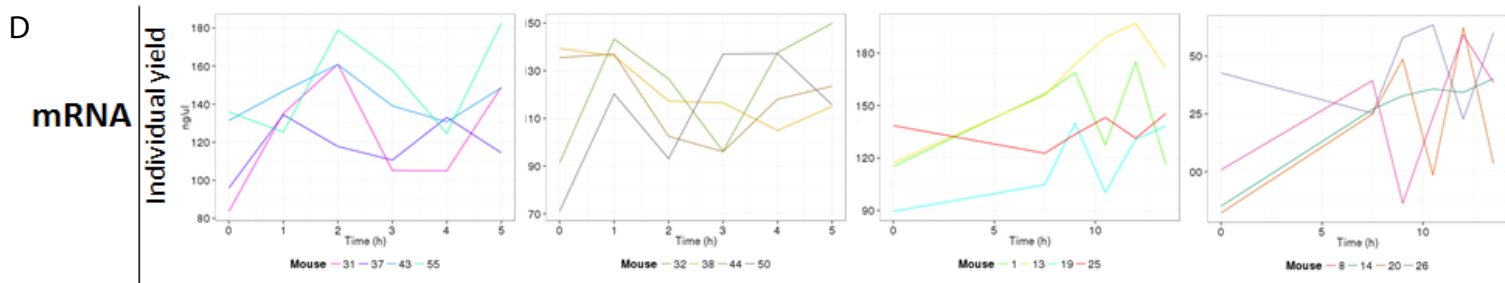

Supplement: pone.0145252.s002.pdf [file pone.0145252.s002.pdf]
